# Supplementary material for: Cellular crosstalk of macrophages and therapeutic implications in non-small cell lung cancer revealed by integrative inference of single-cell transcriptomics
Source: Front Pharmacol. 2023 Nov 15;14:1295442. doi: 10.3389/fphar.2023.1295442 (PMC10690610; doi:10.3389/fphar.2023.1295442)
Supplement: Supplementary file 1 [file Table2.xlsx]

## Sheet: Supplementary Table 2
Supplementary Table 2: Characteristics of including studies in this research.
Dataset	SampleID	Tissue	PatientID	Age	Gender	Stage
Zhang et al.	2018jz1	Tumor	PA13	73	Male	II
Zhang et al.	2018jz11	Tumor	PS02	70	Male	I
Zhang et al.	2018jz12	Tumor	PS01	76	Male	I
Zhang et al.	2018jz14	Normal	PS02	70	Male	I
Zhang et al.	2018jz15	Normal	PS01	76	Male	I
Zhang et al.	2018jz16	Tumor	PS08	55	Male	III
Zhang et al.	2018jz17	Tumor	PA01	50	Male	I
Zhang et al.	2018jz18	Normal	PA08	54	Female	I
Zhang et al.	2018jz19	Tumor	PA08	54	Female	I
Zhang et al.	2018jz2	Normal	PA13	73	Male	II
Zhang et al.	2018jz20	Normal	PA02	54	Female	I
Zhang et al.	2018jz21	Tumor	PA17	53	Male	III
Zhang et al.	2018jz22	Normal	PA17	53	Male	III
Zhang et al.	2018jz23	Tumor	PA20	52	Male	IV
Zhang et al.	2018jz24	Normal	PA11	54	Female	I
Zhang et al.	2018jz25	Normal	PA21	59	Female	IV
Zhang et al.	2018jz26	Tumor	PA21	59	Female	IV
Zhang et al.	2018jz27	Tumor	PS11	62	Male	III
Zhang et al.	2018jz28	Tumor	PA14	55	Male	II
Zhang et al.	2018jz33	Tumor	PA09	79	Female	I
Zhang et al.	2018jz34	Normal	PA09	79	Female	I
Zhang et al.	2018jz36	Normal	PS09	64	Male	III
Zhang et al.	2018jz37	Tumor	PS09	64	Male	III
Zhang et al.	2018jz38	Tumor	PS10	61	Male	III
Zhang et al.	2018jz39	Normal	PS10	61	Male	III
Zhang et al.	2018jz4	Tumor	PS07	48	Male	II
Zhang et al.	2018jz40	Normal	PA15	52	Male	III
Zhang et al.	2018jz41	Tumor	PA15	52	Male	III
Zhang et al.	2018jz44	Tumor	PA11	54	Female	I
Zhang et al.	2018jz45	Normal	PA11	54	Female	I
Zhang et al.	2018jz46	Tumor	PS03	53	Male	I
Zhang et al.	2018jz47	Normal	PS03	53	Male	I
Zhang et al.	2018jz5	Normal	PS07	48	Male	II
Zhang et al.	2018jz50	Tumor	PA05	60	Female	I
Zhang et al.	2018jz53	Tumor	PA18	38	Female	IV
Zhang et al.	2018jz54	Tumor	PA07	61	Male	I
Zhang et al.	2018jz57	Tumor	PA04	60	Male	I
Zhang et al.	2018jz58	Tumor	PA12	64	Female	I
Zhang et al.	2018jz59	Tumor	PA06	53	Female	I
Zhang et al.	2018jz63	Normal	PA07	61	Male	I
Zhang et al.	2018jz7	Tumor	PA19	49	Female	IV
Zhang et al.	2018jz8	Normal	PA19	49	Female	IV
Zhang et al.	AK2831	Tumor	PS05	51	Male	II
Zhang et al.	AK2833	Tumor	PS05	51	Male	II
Zhang et al.	AK2834	Tumor	PS05	51	Male	II
Zhang et al.	AK2851	Normal	PA10	47	Female	I
Zhang et al.	AK2852	Normal	PA10	47	Female	I
Zhang et al.	AK2853	Normal	PA10	47	Female	I
Zhang et al.	AK2854	Normal	PA10	47	Female	I
Zhang et al.	AK3272	Tumor	PS06	55	Male	II
Zhang et al.	AK3273	Tumor	PS06	55	Male	II
Zhang et al.	AK3274	Tumor	PS06	55	Male	II
Zhang et al.	AK3714	Normal	PS06	55	Male	II
Zhang et al.	AK3715	Normal	PS06	55	Male	II
Zhang et al.	AK3716	Normal	PS06	55	Male	II
Zhang et al.	AK4295	Tumor	PS06	55	Male	II
Zhang et al.	AK4296	Tumor	PS06	55	Male	II
Zhang et al.	AK4297	Tumor	PS06	55	Male	II
Zhang et al.	AK4298	Tumor	PS06	55	Male	II
Zhang et al.	AK4433	Normal	PA16	60	Male	III
Zhang et al.	AK4434	Normal	PA16	60	Male	III
Zhang et al.	AK4436	Normal	PA16	60	Male	III
Zhang et al.	AK4556	Tumor	PA16	60	Male	III
Zhang et al.	AK4557	Tumor	PA16	60	Male	III
Zhang et al.	AK4558	Tumor	PA16	60	Male	III
Zhang et al.	AK4559	Tumor	PA16	60	Male	III
Zhang et al.	AK576	Tumor	PS06	55	Male	II
Zhang et al.	AK646	Normal	PA03	55	Female	I
Zhang et al.	AK647	Normal	PA03	55	Female	I
Zhang et al.	AK648	Normal	PA03	55	Female	I
Zhang et al.	AK649	Normal	PA03	55	Female	I
Zhang et al.	AK650	Normal	PS04	80	Male	I
Zhang et al.	AK651	Normal	PS04	80	Male	I
Zhang et al.	AK652	Normal	PS04	80	Male	I
Zhang et al.	AK653	Normal	PS04	80	Male	I
Zhang et al.	AK654	Tumor	PA03	55	Female	I
Zhang et al.	AK655	Tumor	PA03	55	Female	I
Zhang et al.	AK656	Tumor	PA03	55	Female	I
Zhang et al.	AK657	Tumor	PA03	55	Female	I
Zhang et al.	AK658	Tumor	PS04	80	Male	I
Zhang et al.	AK659	Tumor	PS04	80	Male	I
Zhang et al.	AK660	Tumor	PS04	80	Male	I
Zhang et al.	AK661	Tumor	PS04	80	Male	I
Zhang et al.	AK831	Normal	PS05	51	Male	II
Zhang et al.	AK832	Normal	PS05	51	Male	II
Zhang et al.	AK833	Normal	PS05	51	Male	II
Zhang et al.	AK834	Normal	PS05	51	Male	II
Lambrechts et al.	BT1247	Normal	DL2	86	Male	I
Lambrechts et al.	BT1290	Tumor	DL3	68	Male	III
Lambrechts et al.	BT1291	Tumor	DL3	68	Male	III
Lambrechts et al.	BT1292	Tumor	DL3	68	Male	III
Lambrechts et al.	BT1293	Normal	DL3	68	Male	III
Lambrechts et al.	BT1294	Normal	DL4	64	Female	II
Lambrechts et al.	BT1295	Tumor	DL4	64	Female	II
Lambrechts et al.	BT1296	Tumor	DL4	64	Female	II
Lambrechts et al.	BT1297	Tumor	DL4	64	Female	II
Lambrechts et al.	BT1298	Tumor	DL5	60	Male	I
Lambrechts et al.	BT1299	Tumor	DL5	60	Male	I
Lambrechts et al.	BT1300	Tumor	DL5	60	Male	I
Lambrechts et al.	BT1301	Normal	DL5	60	Male	I
Lambrechts et al.	BT1375	Tumor	DL7	60	Male	I
Lambrechts et al.	BT1376	Tumor	DL7	60	Male	I
Lambrechts et al.	BT1377	Tumor	DL7	60	Male	I
Lambrechts et al.	BT1378	Normal	DL7	60	Male	I
Lambrechts et al.	BT1425	Tumor	DL8	55	Female	II
Lambrechts et al.	BT1426	Tumor	DL8	55	Female	II
Lambrechts et al.	BT1427	Tumor	DL8	55	Female	II
Lambrechts et al.	BT1428	Normal	DL8	55	Female	II
Lambrechts et al.	BT1429	Normal	DL6	65	Male	III
Lambrechts et al.	BT1430	Tumor	DL6	65	Male	III
Lambrechts et al.	BT1431	Tumor	DL6	65	Male	III
Lambrechts et al.	BT1432	Tumor	DL6	65	Male	III
Lambrechts et al.	BT1A	Tumor	DL1	70	Female	II
Lambrechts et al.	BT1B	Tumor	DL1	70	Female	II
Lambrechts et al.	BT1C	Tumor	DL1	70	Female	II
Lambrechts et al.	BT2A	Tumor	DL2	86	Male	I
Lambrechts et al.	BT2B	Tumor	DL2	86	Male	I
Bischoff et al.	p018t	Tumor	p018	58	Female	I
Bischoff et al.	p018n	Normal	p018	58	Female	I
Bischoff et al.	p019t	Tumor	p019	81	Male	III
Bischoff et al.	p019n	Normal	p019	81	Male	III
Bischoff et al.	p023t	Tumor	p023	62	Female	I
Bischoff et al.	p024t	Tumor	p024	63	Female	I
Bischoff et al.	p027t	Tumor	p027	49	Male	I
Bischoff et al.	p027n	Normal	p027	49	Male	I
Bischoff et al.	p028n	Normal	p028	77	Male	III
Bischoff et al.	p029n	Normal	p029	59	Female	II
Bischoff et al.	p030t	Tumor	p030	63	Male	IV
Bischoff et al.	p030n	Normal	p030	63	Male	IV
Bischoff et al.	p031t	Tumor	p031	77	Male	I
Bischoff et al.	p031n	Normal	p031	77	Male	I
Bischoff et al.	p032t	Tumor	p032	83	Female	I
Bischoff et al.	p032n	Normal	p032	83	Female	I
Bischoff et al.	p033t	Tumor	p033	64	Female	II
Bischoff et al.	p033n	Normal	p033	64	Female	II
Bischoff et al.	p034t	Tumor	p034	63	Male	II
Bischoff et al.	p034n	Normal	p034	63	Male	II
